# Supplementary material
Source: Springer Nature journal article supplement (https://www.springermedizin.de/resource/supplementary/12986_2010_301_MOESM6_ESM.pdf/25655792)

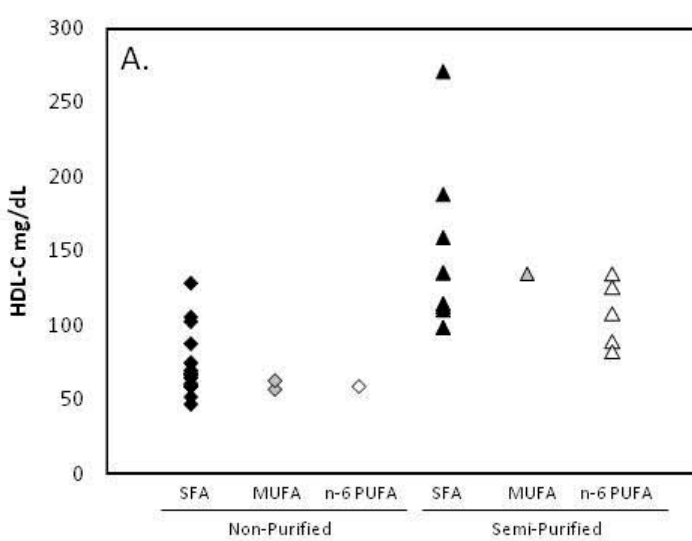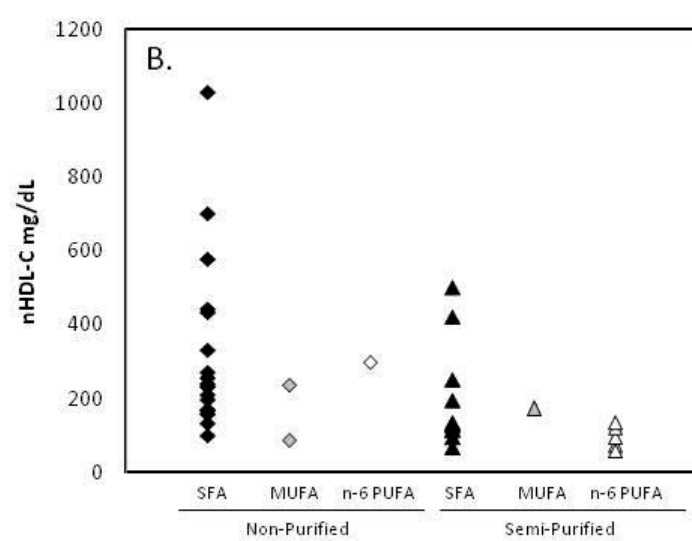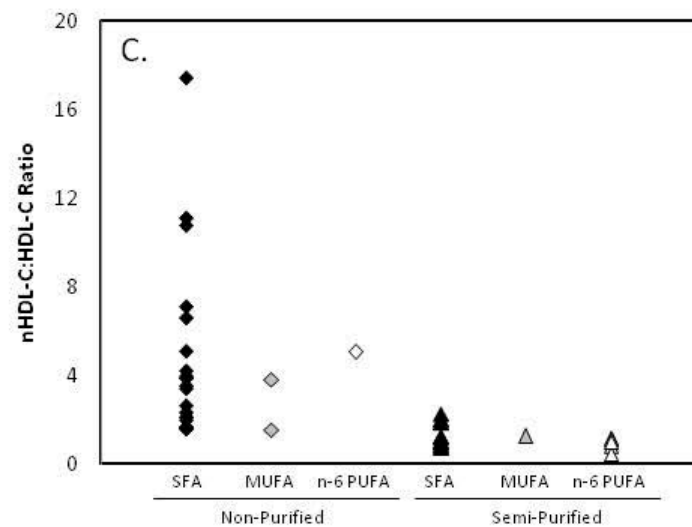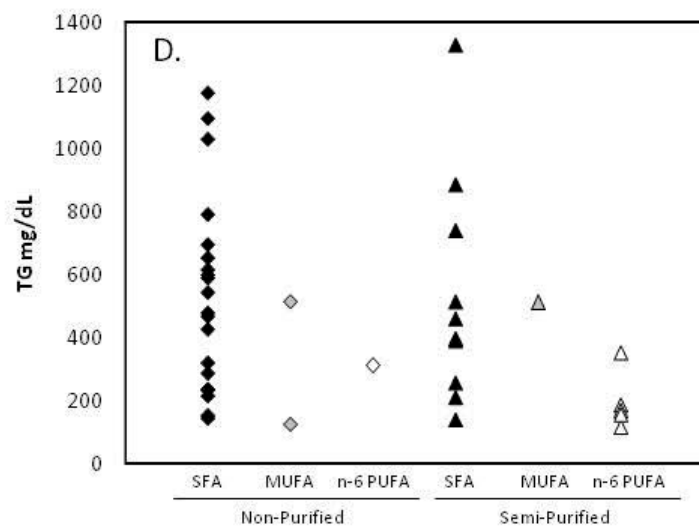

Supplement: MOESM6 [file 25655792]
